# Supplementary material for: Triclocarban exposure exaggerates colitis and colon tumorigenesis: roles of gut microbiota involved
Source: PubMed Central journal article supplement — Gut Microbes. 2019 Nov 24;12(1):1690364. doi: 10.1080/19490976.2019.1690364 (PMC7524142; doi:10.1080/19490976.2019.1690364), 2019-11-24
Supplement: KGMI_A_1690364_SM8631.pdf [file KGMI_A_1690364_SM8631.pdf]

## Supplemental Information

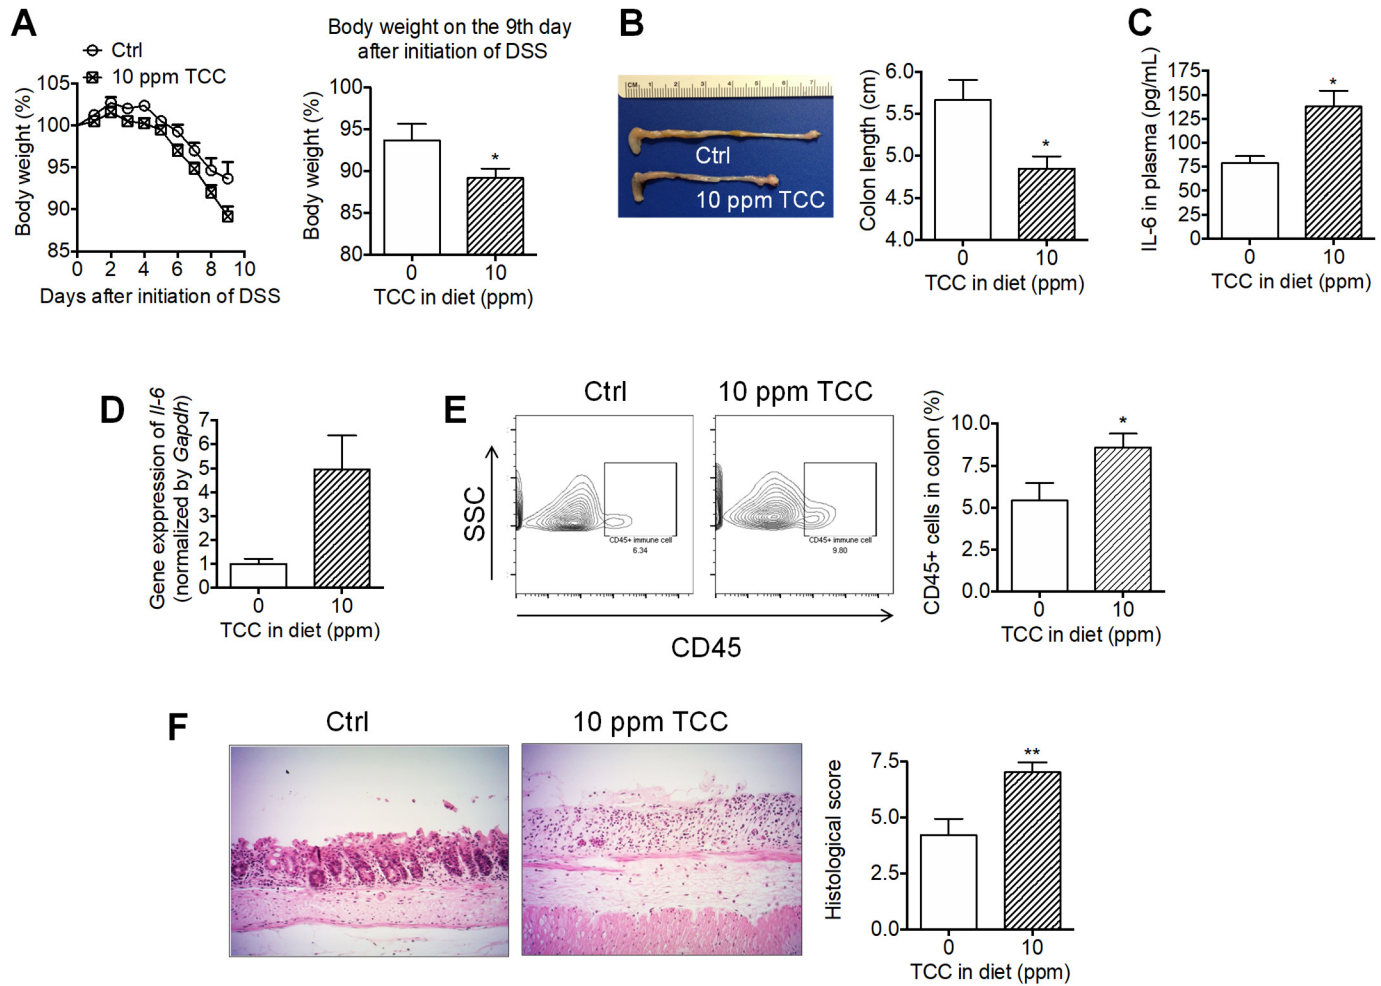

**Fig. S1.** Effect of a lower-dose TCC (10 ppm in diet) on DSS-induced colitis in mice. (A) Body weight. *Left*: time-course of body weight; *Right*: quantification of mouse body weight on the final day. (B) Colon length. (C) Concentration of IL-6 in plasma. (D) Gene expression of *Il-6* in colon. (E) FACS quantification of immune cell infiltration into colon. (F) H&E staining of the colon. The data are mean  $\pm$  SEM, \*  $P < 0.05$ , \*\*  $P < 0.01$ ,  $n = 8$  mice per group. Note: the control group (0 ppm TCC in diet) is the same as the control group in Fig. 1.

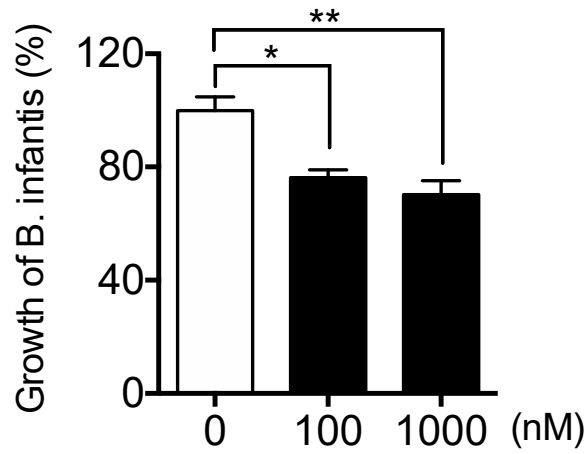

**Fig. S2.** Effect of TCC on *B. infantis* 272 growth. *B. Infantis* 272 was treated with TCC or vehicle (DMSO) under anaerobic conditions for 48 h, then bacterial growth was analyzed by measuring the turbidity at 600 nm. The results are expressed as mean  $\pm$  SEM, from three independent experiments conducted in triplicates, \*  $P < 0.05$ , \*\*  $P < 0.01$ .

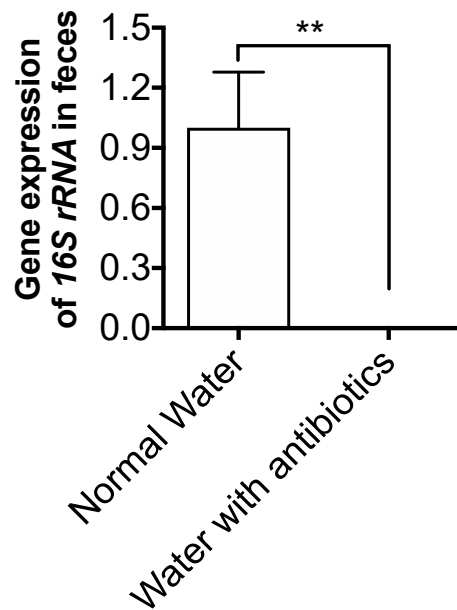

**Fig. S3.** Effect of the antibiotic cocktail on fecal bacteria load. The mice were given drinking water with or without the antibiotic cocktail (1.0 g/L ampicillin and 0.5 g/L neomycin) for 5 days. Feces were collected and 16S rRNA gene expression in feces were analyzed by qRT-PCR (n = 7 per group). The results are expressed as mean  $\pm$  SEM, \*\*  $P < 0.01$ .

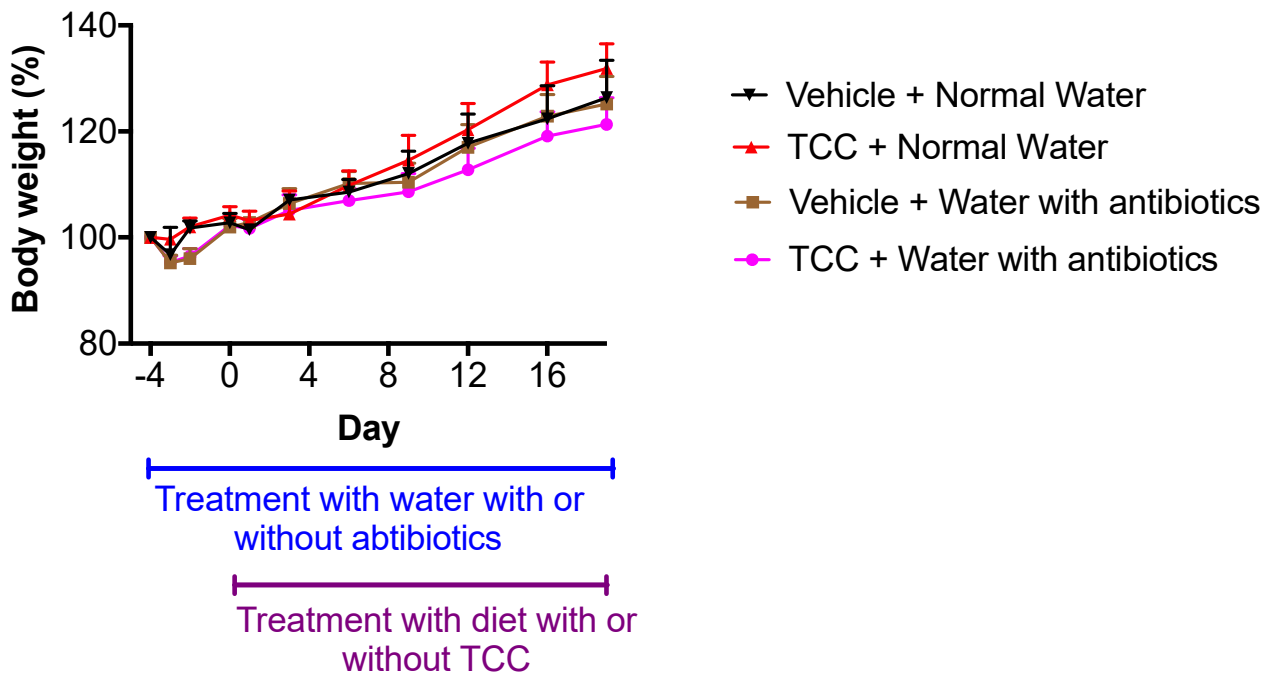

**Fig. S4.** Effect of TCC and/or antibiotic cocktail on mouse body weight (before the DSS stimulation). The results are expressed as mean  $\pm$  SEM.

**Table S1. Composition of the modified AIN-93G diet used in the animal experiment**

| <b>Ingredients</b>    | <b>g/kg</b> |
|-----------------------|-------------|
| Casein                | 200         |
| L-cystine             | 3           |
| Sucrose               | 100         |
| Dyetrose              | 132         |
| Cornstarch            | 397.486     |
| Cellulose             | 50          |
| Mineral mix #210025   | 35          |
| Vitamin mix #310025   | 10          |
| Choline Bitartrate    | 2.5         |
| Corn oil (purified) * | 70          |
| Vitamin A Palmitate   | 0.016       |

\* All ingredients, except corn oil, were purchased from Dyets Inc (Bethlehem, PA). Corn oil has a high abundance of polyunsaturated fatty acids which are prone to lipid oxidation during production and storage; therefore, we purchased commercial samples of fresh corn oil and purified the oils using a chromatography column to minimize the potential variation of oxidized components in corn oil. Briefly, commercial corn oil (Mazola<sup>®</sup>, ACH Food company, Inc., Cordova, TN) was purchased from a local market in Amherst, MA, and purified by a silicic acid-activated charcoal chromatography to remove any pre-existing oxidized compounds, then the purified oil was fortified with 400 ppm tocopherols, flushed with N<sub>2</sub>, and stored at -80°C until use.

**Table S2. Sequences of primers in qRT-PCR and 16S rRNA sequencing**

| <b>Gene</b>                    | <b>Forward</b>                                         | <b>Reverse</b>                                              |
|--------------------------------|--------------------------------------------------------|-------------------------------------------------------------|
| <b>Primers for qRT-PCR</b>     |                                                        |                                                             |
| <i>Gapdh</i>                   | AGGTCGGTGTGAACGGATTTG                                  | TGTAGACCATGTAGTTGAGGTCA                                     |
| <i>Tnf-<math>\alpha</math></i> | CCCTCACACTCAGATCATCTTCT                                | GCTACGACGTGGGCTACAG                                         |
| <i>Il-6</i>                    | TAGTCCTTCCTACCCCAATTTCC                                | TTGGTCCTTAGCCACTCCTTC                                       |
| <i>Ifny</i>                    | ATGAACGCTACACACTGCATC                                  | CCATCCTTTTGCCAGTTCCTC                                       |
| <i>Tlr4</i>                    | ATGGCATGGCTTACACCACC                                   | GAGGCCAATTTTGTCTCCACA                                       |
| <i>Il-10</i>                   | GCTCTTACTGACTGGCATGAG                                  | CGCAGCTCTAGGAGCATGTG                                        |
| <i>Il-1<math>\beta</math></i>  | GCAACTGTTCTGAACTCAACT                                  | ATCTTTTGGGGTCCGTCAACT                                       |
| <i>C-myc</i>                   | TGAAGTTCACGTTGAGGGG                                    | AGAGCTCCTCGAGCTGTTTG                                        |
| <i>Axin 2</i>                  | TGCATCTCTCTGGAGCTG                                     | ACTGACCGACGATTCCATGT                                        |
| <b>Primers for sequencing</b>  |                                                        |                                                             |
| <i>16S rRNA</i>                | TCGTCGGCAGCGTCAGATGTGTAT<br>AAGAGACAGCCTACGGGNGGCWGCAG | GTCTCGTGGGCTCGGAGATGTGTATA<br>AGAGACAGGACTACHVGGGTATCTAATCC |

**Table S3. Effects of TCC on composition of the microbiota at phylum levels (\*  $P < 0.05$ , \*\*  $P < 0.01$ , \*\*\*  $P < 0.001$ ). The results are expressed as relative abundance (%).**

| Phylum Name            | Ctrl    |       | TCC     |       |
|------------------------|---------|-------|---------|-------|
|                        | Average | SEM   | Average | SEM   |
| <i>Unassigned</i>      | 1.290   | 0.111 | 0.547   | 0.092 |
| <i>Actinobacteria</i>  | 3.505   | 0.930 | 1.091   | 0.509 |
| <i>Bacteroidetes</i>   | 52.984  | 1.841 | 32.209  | 5.054 |
| <i>Cyanobacteria</i>   | 0.734   | 0.163 | 0.137   | 0.079 |
| <i>Deferribacteres</i> | 1.686   | 0.478 | 0.004   | 0.002 |
| <i>Firmicutes</i>      | 38.873  | 1.670 | 62.104  | 4.437 |
| <i>Proteobacteria</i>  | 0.385   | 0.096 | 2.048   | 0.567 |
| <i>Tenericutes</i>     | 0.031   | 0.004 | 0.054   | 0.027 |
| <i>Verrucomicrobia</i> | 0.511   | 0.193 | 1.806   | 1.231 |

**Table S4. Effects of TCC on composition of the microbiota at genus levels. The results are expressed as relative abundance (%).**

| Genus Name                          | Ctrl    |       | TCC     |     |       |
|-------------------------------------|---------|-------|---------|-----|-------|
|                                     | Average | SEM   | Average | SEM |       |
| Unassigned                          | 1.290   | 0.111 | 0.547   | *** | 0.092 |
| <i>Prauseria</i>                    | 0.004   | 0.001 | 0.012   | **  | 0.004 |
| <i>Bifidobacterium</i>              | 3.352   | 0.922 | 0.889   | *   | 0.490 |
| <i>Adlercreutzia</i>                | 0.145   | 0.014 | 0.159   |     | 0.034 |
| <i>Eggerthella</i>                  | 0.000   | 0.000 | 0.019   | *   | 0.012 |
| <i>o__Bacteroidales;Other;Other</i> | 0.022   | 0.007 | 0.002   | *** | 0.001 |
| <i>Bacteroides</i>                  | 19.876  | 2.123 | 17.980  |     | 2.163 |
| <i>Parabacteroides</i>              | 13.855  | 2.009 | 10.540  |     | 2.958 |
| <i>f__Rikenellaceae;g__</i>         | 0.336   | 0.053 | 0.224   |     | 0.065 |
| <i>f__S24-7;g__</i>                 | 13.529  | 3.403 | 0.004   | *** | 0.002 |
| <i>Butyricimonas</i>                | 5.362   | 0.358 | 3.451   |     | 0.935 |
| <i>o__YS2;f__;g__</i>               | 0.734   | 0.163 | 0.137   | *** | 0.079 |
| <i>Mucispirillum</i>                | 1.686   | 0.478 | 0.004   | *** | 0.002 |
| <i>f__Bacillaceae;g__</i>           | 0.015   | 0.002 | 0.058   | *   | 0.021 |
| <i>Staphylococcus</i>               | 0.004   | 0.002 | 0.117   |     | 0.108 |
| <i>Enterococcus</i>                 | 0.020   | 0.007 | 0.036   |     | 0.023 |
| <i>Lactobacillus</i>                | 5.887   | 1.179 | 2.831   | *   | 1.644 |
| <i>Streptococcus</i>                | 0.008   | 0.001 | 0.097   |     | 0.086 |
| <i>Turicibacter</i>                 | 0.139   | 0.053 | 0.008   | *   | 0.007 |
| <i>o__Clostridiales;Other;Other</i> | 0.037   | 0.008 | 0.070   | *   | 0.012 |
| <i>o__Clostridiales;f__;g__</i>     | 11.102  | 1.453 | 22.917  | **  | 3.528 |
| <i>f__Christensenellaceae;g__</i>   | 0.110   | 0.014 | 0.084   |     | 0.020 |
| <i>f__Clostridiaceae;Other</i>      | 0.014   | 0.010 | 0.002   | *   | 0.002 |
| <i>f__Clostridiaceae;g__</i>        | 0.081   | 0.015 | 0.390   | **  | 0.112 |
| <i>Clostridium</i>                  | 0.009   | 0.002 | 0.013   |     | 0.003 |
| <i>Dehalobacterium</i>              | 0.232   | 0.027 | 0.061   | *** | 0.017 |
| <i>f__Lachnospiraceae;Other</i>     | 0.339   | 0.064 | 0.330   |     | 0.025 |
| <i>f__Lachnospiraceae;g__</i>       | 3.937   | 0.554 | 7.393   | **  | 1.097 |
| <i>Anaerostipes</i>                 | 0.002   | 0.000 | 0.011   | *   | 0.003 |
| <i>Blautia</i>                      | 0.001   | 0.000 | 0.003   |     | 0.001 |
| <i>Coprococcus</i>                  | 0.251   | 0.024 | 0.771   | *** | 0.128 |
| <i>Dorea</i>                        | 0.273   | 0.117 | 0.541   | *   | 0.134 |
| <i>Pseudobutyrvibrio</i>            | 0.037   | 0.009 | 0.007   | **  | 0.004 |
| <i>Roseburia</i>                    | 0.013   | 0.007 | 0.016   |     | 0.006 |
| <i>[Ruminococcus]</i>               | 0.528   | 0.047 | 1.369   | *** | 0.211 |
| <i>f__Peptococcaceae;g__</i>        | 0.058   | 0.012 | 0.046   |     | 0.017 |
| <i>rc4-4</i>                        | 1.163   | 0.269 | 1.762   |     | 0.962 |
| <i>f__Peptostreptococcaceae;g__</i> | 0.010   | 0.006 | 0.027   |     | 0.027 |
| <i>f__Ruminococcaceae;Other</i>     | 0.806   | 0.091 | 0.875   |     | 0.169 |
| <i>f__Ruminococcaceae;g__</i>       | 3.514   | 0.390 | 7.578   | **  | 1.361 |
| <i>Anaerotruncus</i>                | 0.013   | 0.004 | 0.019   |     | 0.007 |
| <i>Oscillospira</i>                 | 5.521   | 0.531 | 6.877   |     | 0.851 |
| <i>Ruminococcus</i>                 | 3.863   | 0.422 | 6.806   |     | 2.216 |
| <i>f__[Mogibacteriaceae];g__</i>    | 0.031   | 0.005 | 0.017   | *   | 0.004 |
| <i>o__SHA-98;f__;g__</i>            | 0.002   | 0.001 | 0.000   |     | 0.000 |
| <i>f__Erysipelotrichaceae;Other</i> | 0.019   | 0.006 | 0.011   |     | 0.003 |
| <i>f__Erysipelotrichaceae;g__</i>   | 0.795   | 0.140 | 0.873   |     | 0.179 |
| <i>Clostridium</i>                  | 0.026   | 0.006 | 0.027   |     | 0.006 |
| <i>Coprobacillus</i>                | 0.007   | 0.003 | 0.044   |     | 0.025 |
| <i>o__RF32;f__;g__</i>              | 0.125   | 0.040 | 0.199   |     | 0.092 |

|                                    |       |       |       |     |       |
|------------------------------------|-------|-------|-------|-----|-------|
| <i>Burkholderia</i>                | 0.019 | 0.002 | 0.082 | *** | 0.044 |
| <i>f__Oxalobacteraceae;Other</i>   | 0.006 | 0.001 | 0.016 | **  | 0.004 |
| <i>f__Enterobacteriaceae;Other</i> | 0.000 | 0.000 | 0.004 |     | 0.002 |
| <i>f__Enterobacteriaceae;g__</i>   | 0.164 | 0.038 | 1.395 | *** | 0.458 |
| <i>Enterobacter</i>                | 0.048 | 0.031 | 0.123 |     | 0.050 |
| <i>Klebsiella</i>                  | 0.000 | 0.000 | 0.187 | **  | 0.127 |
| <i>Stenotrophomonas</i>            | 0.006 | 0.001 | 0.008 |     | 0.002 |
| <i>o__RF39;f__;g__</i>             | 0.031 | 0.004 | 0.054 |     | 0.027 |
| <i>Akkermansia</i>                 | 0.511 | 0.193 | 1.806 |     | 1.231 |

---
